# Supplementary material for: Comparative transcriptome and metabolite survey reveal key pathways involved in the control of the chilling injury disorder superficial scald in two apple cultivars, ‘Granny Smith’ and ‘Ladina’
Source: Front Plant Sci. 2023 Apr 20;14:1150046. doi: 10.3389/fpls.2023.1150046 (PMC10157158; doi:10.3389/fpls.2023.1150046)
Supplement: Supplementary file 17 [file Table_10.xlsx]

## Sheet: Supp_Table 10
Supplementary Table 10 Gene ontology enrichment analysis for biological process performed on genes deriving from the K-means cluster analysis and belonging to cluster C. p-adjust correspond to False discovery rate (FDR) ≤0.05.
Gene enrichment analysis for GO:Biological Process - Cluster C
	GO Term	n° of genes	n°of genes in background	p_value	FDR	Description
1	GO:0006629	125	2122	1.18e-19	8.48e-16	Lipid metabolic process
2	GO:0008610	86	1157	2.44e-19	8.75e-16	Lipid biosynthetic process
3	GO:0032787	79	1056	5.33e-18	1.28e-14	Monocarboxylic acid metabolic process
4	GO:0006631	55	560	1.8e-17	3.24e-14	Fatty acid metabolic process
5	GO:0044255	99	1589	3.35e-17	4.81e-14	Cellular lipid metabolic process
6	GO:0006633	42	362	6.41e-16	7.67e-13	Fatty acid biosynthetic process
7	GO:0006082	115	2155	3.13e-15	3.22e-12	Organic acid metabolic process
8	GO:0043436	114	2148	5.96e-15	5.35e-12	Oxoacid metabolic process
9	GO:0072330	46	532	5.25e-13	4.19e-10	Monocarboxylic acid biosynthetic process
10	GO:0055114	152	3510	1.24e-12	8.89e-10	Oxidation-reduction process
11	GO:0019752	101	2040	1.13e-11	7.39e-09	Carboxylic acid metabolic process
12	GO:0044281	140	3315	5.76e-11	3.45e-08	Small molecule metabolic process
13	GO:0009409	39	471	1e-10	5.53e-08	Response to cold
14	GO:0046394	59	1111	2.58e-08	1.32e-05	Carboxylic acid biosynthetic process
15	GO:0010025	10	35	6.21e-08	2.79e-05	Wax biosynthetic process
16	GO:0044283	71	1504	8.6e-08	3.63e-05	Small molecule biosynthetic process
17	GO:0044262	45	775	1.14e-07	4.54e-05	Cellular carbohydrate metabolic process
18	GO:0009266	46	805	1.27e-07	4.57e-05	Response to temperature stimulus
19	GO:0042761	10	40	1.8e-07	6.17e-05	Very long-chain fatty acid biosynthetic process
20	GO:0006073	26	327	2.65e-07	8.64e-05	Cellular glucan metabolic process
21	GO:0005975	82	1925	5.13e-07	0.00015	Carbohydrate metabolic process
22	GO:0006811	85	2027	5.82e-07	0.00017	Ion transport
23	GO:1901570	11	60	6.7e-07	0.00019	Fatty acid derivative biosynthetic process
24	GO:1901568	14	107	8.43e-07	0.00022	Fatty acid derivative metabolic process
25	GO:0016051	33	528	1.23e-06	0.00031	Carbohydrate biosynthetic process
26	GO:0042221	158	4577	1.46e-06	0.00035	Response to chemical
27	GO:0009628	103	2677	1.65e-06	0.00038	Response to abiotic stimulus
28	GO:0009725	90	2246	1.65e-06	0.00038	Response to hormone
29	GO:0006812	57	1216	1.99e-06	0.00043	Cation transport
30	GO:0055065	27	397	2.62e-06	0.00055	Metal ion homeostasis
31	GO:0009250	18	200	3.65e-06	0.00075	Glucan biosynthetic process
32	GO:0034637	25	357	3.76e-06	0.00075	Cellular carbohydrate biosynthetic process
33	GO:0006637	11	75	4.68e-06	0.00091	acyl-CoA metabolic process
34	GO:0044264	29	469	6.47e-06	0.0012	Cellular polysaccharide metabolic process
35	GO:0050896	298	10108	1.68e-05	0.0029	Response to stimulus
36	GO:1901700	87	2288	1.66e-05	0.0029	Response to oxygen-containing compound
37	GO:0010143	7	30	1.9e-05	0.0032	Cutin biosynthetic process
38	GO:0051274	12	106	1.92e-05	0.0032	Beta-glucan biosynthetic process
39	GO:0030244	10	73	2.15e-05	0.0034	Cellulose biosynthetic process
40	GO:0032870	66	1626	2.82e-05	0.0044	Cellular response to hormone stimulus
41	GO:0033692	21	307	3.01e-05	0.0046	Cellular polysaccharide biosynthetic process
42	GO:0055085	93	2532	3e-05	0.0046	Transmembrane transport
43	GO:0098771	28	499	4.76e-05	0.007	Inorganic ion homeostasis
44	GO:0006636	9	65	5.12e-05	0.0074	Unsaturated fatty acid biosynthetic process
45	GO:0009755	63	1566	5.46e-05	0.0077	Hormone-mediated signaling pathway
46	GO:0034220	62	1534	5.51e-05	0.0077	Ion transmembrane transport
47	GO:0010167	7	37	6.16e-05	0.0081	Response to nitrate
48	GO:0042128	8	51	6.06e-05	0.0081	Nitrate assimilation
49	GO:0009415	25	434	8.02e-05	0.0099	Response to water
50	GO:0033875	12	124	7.82e-05	0.0099	Ribonucleoside bisphosphate metabolic process
51	GO:0034032	12	124	7.82e-05	0.0099	Purine nucleoside bisphosphate metabolic process
52	GO:0098655	43	953	8e-05	0.0099	Cation transmembrane transport
53	GO:0010033	108	3138	8.7e-05	0.0101	Response to organic substance
54	GO:0000271	22	359	9.14e-05	0.0104	Polysaccharide biosynthetic process
55	GO:0050801	29	548	9.32e-05	0.0105	Ion homeostasis
56	GO:0051273	13	149	0.00011	0.0117	Beta-glucan metabolic process
57	GO:0010345	7	41	0.00011	0.0119	Suberin biosynthetic process
58	GO:0098660	43	976	0.00013	0.0139	Inorganic ion transmembrane transport
59	GO:0098662	39	861	0.00016	0.0163	Inorganic cation transmembrane transport
60	GO:0009414	24	429	0.00017	0.0169	Response to water deprivation
61	GO:0030001	37	804	0.00017	0.0169	Metal ion transport
62	GO:0030243	11	116	0.00018	0.0178	Cellulose metabolic process
63	GO:0071616	6	33	0.00025	0.0244	acyl-CoA biosynthetic process
64	GO:1901576	188	6212	0.00026	0.0248	Organic substance biosynthetic process
65	GO:0044275	11	123	0.00029	0.027	Cellular carbohydrate catabolic process
66	GO:0070887	94	2747	0.0003	0.0279	Cellular response to chemical stimulus
67	GO:0005976	35	774	0.00034	0.0311	Polysaccharide metabolic process
68	GO:0015672	28	568	0.00036	0.0327	Monovalent inorganic cation transport
69	GO:2001295	4	12	0.00041	0.0362	malonyl-CoA biosynthetic process
70	GO:0000041	17	275	0.0005	0.0433	Transition metal ion transport
71	GO:0035672	9	92	0.00056	0.0471	Oligopeptide transmembrane transport
72	GO:0080167	9	92	0.00056	0.0471	Response to karrikin
